# Supplementary material
Source: MDPI journal article supplement (https://www.mdpi.com/2073-4433/13/1/30)
Supplement: s1 [file s1]

## Supplementary Materials:

# The Content and Sources of Potentially Toxic Elements in the Road Dust of Surgut (Russia)

Dmitriy Moskovchenko <sup>1,2,\*</sup>, Roman Pozhitkov <sup>1</sup>, Andrey Soromotin <sup>2</sup> and Valeriy Tyurin <sup>3</sup>

**Table S1.** Description of sampling sites.

| Sample name | Sample number | Latitude  | Longitude | Location                      | Traffic intensity | Collection date |
|-------------|---------------|-----------|-----------|-------------------------------|-------------------|-----------------|
| SD1-2021    | 1             | 61.285056 | 73.381167 | industrial and warehouse area | Low               | 17.07.2021      |
| SD2-2021    | 2             | 61.287333 | 73.393500 | industrial and warehouse area | Moderate          | 17.07.2021      |
| SD3-2021    | 3             | 61.276222 | 73.404833 | industrial and warehouse area | High              | 17.07.2021      |
| SD4-2021    | 4             | 61.271250 | 73.425833 | industrial and warehouse area | Low               | 17.07.2021      |
| SD5-2021    | 5             | 61.281306 | 73.435944 | industrial and warehouse area | High              | 17.07.2021      |
| SD6-2021    | 6             | 61.273667 | 73.385833 | industrial and warehouse area | High              | 17.07.2021      |
| SD7-2021    | 7             | 61.258750 | 73.367833 | high-rise residential area    | Moderate          | 17.07.2021      |
| SD8-2021    | 8             | 61.275778 | 73.482667 | power plant area              | Moderate          | 18.07.2021      |
| SD9-2021    | 9             | 61.276333 | 73.501917 | power plant area              | High              | 18.07.2021      |
| SD10-2021   | 10            | 61.279278 | 73.521000 | power plant area              | High              | 18.07.2021      |
| SD11-2021   | 11            | 61.237222 | 73.483083 | low-rise area                 | High              | 18.07.2021      |
| SD12-2021   | 12            | 61.236417 | 73.474639 | low-rise area                 | High              | 18.07.2021      |
| SD13-2021   | 13            | 61.240111 | 73.473972 | low-rise area                 | Moderate          | 18.07.2021      |
| SD14-2021   | 14            | 61.238194 | 73.457639 | low-rise area                 | High              | 18.07.2021      |
| SD15-2021   | 15            | 61.236139 | 73.441528 | high-rise residential area    | Moderate          | 18.07.2021      |
| SD16-2021   | 16            | 61.240972 | 73.407917 | modern business zone          | High              | 18.07.2021      |
| SD17-2021   | 17            | 61.241000 | 73.392389 | modern business zone          | High              | 18.07.2021      |
| SD18-2021   | 18            | 61.237333 | 73.374778 | modern business zone          | High              | 18.07.2021      |

|           |    |           |           |                            |          |            |
|-----------|----|-----------|-----------|----------------------------|----------|------------|
| SD19-2021 | 19 | 61.251056 | 73.376444 | high-rise residential area | Moderate | 18.07.2021 |
| SD20-2021 | 20 | 61.253472 | 73.391667 | high-rise residential area | Moderate | 18.07.2021 |
| SD21-2021 | 21 | 61.250000 | 73.418194 | high-rise residential area | Moderate | 18.07.2021 |
| SD22-2021 | 22 | 61.261944 | 73.413694 | high-rise residential area | High     | 18.07.2021 |
| SD23-2021 | 23 | 61.265917 | 73.376056 | high-rise residential area | High     | 18.07.2021 |
| SD24-2021 | 24 | 61.338389 | 73.410583 | transport hub              | High     | 18.07.2021 |
| SD25-2021 | 25 | 61.288972 | 73.322556 | transport hub              | High     | 18.07.2021 |

**Table S2.** Methods of analysis, analytical results and recovery of certified reference material.

| Element                        | Method | DL     | Trapp ST-2 (GSO 8670-2005) |               |            | BHVO-2 (US Geological Survey) |               |            |
|--------------------------------|--------|--------|----------------------------|---------------|------------|-------------------------------|---------------|------------|
|                                |        |        | Certified value            | Found average | Recovery % | Certified value               | Found average | Recovery % |
| Na <sub>2</sub> O              | AES    | 0.001  | 2.32                       | 2.3           | 98.1       | 2.22                          | 2.1           | 94.8       |
| MgO                            | AES    | 0.005  | 7.51                       | 7.4           | 98.1       | 7.23                          | 7.2           | 99.0       |
| Al <sub>2</sub> O <sub>3</sub> | AES    | 0.009  | 14.63                      | 14.6          | 99.6       | 13.5                          | 13.6          | 100.6      |
| P <sub>2</sub> O <sub>5</sub>  | AES    | 0.005  | 0.17                       | 0.2           | 98.5       | 0.27                          | 0.3           | 96.5       |
| S                              | AES    | 0.002  | 0.026                      | 0.022         | 85.3       | -                             | 0.018         | -          |
| K <sub>2</sub> O               | AES    | 0.002  | 0.46                       | 0.4           | 97.6       | 0.52                          | 0.49          | 93.5       |
| CaO                            | AES    | 0.005  | 10.42                      | 10.4          | 99.7       | 11.4                          | 11.3          | 99.4       |
| TiO <sub>2</sub>               | AES    | 0.0005 | 1.59                       | 1.6           | 100.1      | 2.73                          | 2.6           | 97.0       |
| MnO                            | AES    | 0.0004 | 0.21                       | 0.21          | 101.1      | 0.17                          | 0.2           | 92.9       |
| Fe <sub>2</sub> O <sub>3</sub> | AES    | 0.01   | 14.62                      | 14.4          | 98.3       | 12.3                          | 12.4          | 101.1      |
| Li                             | MS     | 0.03   | 8.6                        | 10.0          | 116.1      | 5                             | 89.5          | 89.5       |
| Be                             | MS     | 0.02   | 0.8                        | 0.8           | 95.5       | -                             | -             | -          |
| Sc                             | MS     | 0.06   | 41                         | 43.0          | 104.9      | 32                            | 98.7          | 98.7       |
| V                              | MS     | 0.6    | 315                        | 317.0         | 100.6      | 317                           | 100.5         | 100.5      |
| Cr                             | MS     | 0.7    | 213                        | 242.4         | 113.8      | 280                           | 96.8          | 96.8       |
| Co                             | MS     | 0.2    | 52                         | 54.1          | 104.1      | 45                            | 96.0          | 96.0       |
| Ni                             | MS     | 0.9    | 126                        | 120.5         | 95.6       | 119                           | 97.0          | 97.0       |
| Cu                             | MS     | 0.8    | 180                        | 186.5         | 103.6      | 127                           | 96.9          | 96.9       |
| Zn                             | MS     | 0.8    | 112                        | 110.6         | 98.7       | 103                           | 110.5         | 110.5      |
| Ga                             | MS     | 0.02   | 17                         | 19.5          | 114.5      | 21.7                          | 84.6          | 84.6       |
| As                             | MS     | 0.06   | -                          | 2.3           | -          | -                             | <DL           | -          |
| Se                             | MS     | 0.8    | -                          | <DL           | -          | -                             | <DL           | -          |

|    |    |       |        |       |       |      |       |       |
|----|----|-------|--------|-------|-------|------|-------|-------|
| Rb | MS | 0.04  | 11     | 12.0  | 109.2 | 9.8  | 88.6  | 88.6  |
| Sr | MS | 0.03  | 197    | 207.5 | 105.3 | 389  | 103.2 | 103.2 |
| Y  | MS | 0.05  | 29     | 30.6  | 105.6 | 26   | 95.7  | 95.7  |
| Zr | MS | 0.02  | 125    | 114.6 | 91.7  | 172  | 102.6 | 102.6 |
| Nb | MS | 0.02  | 6.0    | 5.3   | 88.6  | 18   | 96.7  | 96.7  |
| Mo | MS | 0.06  | 1.0    | 0.8   | 78.2  | -    | <DL   | -     |
| Rh | MS | 0.06  | -      | <DL   | -     | -    | <DL   | -     |
| Pd | MS | 0.06  | -      | <DL   | -     | -    | <DL   | -     |
| Ag | MS | 0.03  | 0.05   | 0.1   | 153.2 | -    | <DL   | -     |
| Cd | MS | 0.03  | -      | 0.1   | -     | -    | <DL   | -     |
| Sn | MS | 0.07  | 1.6    | 1.0   | 59.1  | 1.9  | 76.7  | 76.7  |
| Sb | MS | 0.03  | -      | 0.2   | -     | -    | <DL   | -     |
| Te | MS | 0.06  | -      | <DL   | -     | -    | <DL   | -     |
| Cs | MS | 0.01  | 0.5    | 0.4   | 84.0  | -    | <DL   | -     |
| Ba | MS | 0.07  | 227    | 158.4 | 69.8  | 130  | 99.3  | 99.3  |
| La | MS | 0.01  | 8      | 8.2   | 102.8 | 15.0 | 101.2 | 101.2 |
| Ce | MS | 0.02  | 22     | 20.9  | 95.2  | 38.0 | 100.6 | 100.6 |
| Pr | MS | 0.004 | 2.6    | 2.8   | 105.8 | -    | <DL   | -     |
| Nd | MS | 0.01  | 13.2   | 14.0  | 105.8 | 25.0 | 98.0  | 98.0  |
| Sm | MS | 0.008 | 4.0    | 4.1   | 101.6 | 6.2  | 94.0  | 94.0  |
| Eu | MS | 0.007 | 1.4    | 1.4   | 102.7 | -    | <DL   | -     |
| Gd | MS | 0.009 | 4.5    | 4.4   | 98.2  | 6.3  | 88.0  | 88.0  |
| Tb | MS | 0.006 | 0.8    | 0.8   | 98.8  | 0.9  | 98.6  | 98.6  |
| Dy | MS | 0.005 | 5.1    | 5.2   | 101.5 | -    | <DL   | -     |
| Ho | MS | 0.007 | 1.0    | 1.1   | 107.8 | 1.0  | 89.4  | 89.4  |
| Er | MS | 0.005 | 2.9    | 3.2   | 109.5 | -    | <DL   | -     |
| Tm | MS | 0.005 | 0.44   | 0.5   | 102.4 | -    | <DL   | -     |
| Yb | MS | 0.007 | 3.3    | 3.2   | 98.0  | 2.0  | 104.5 | 104.5 |
| Lu | MS | 0.004 | 0.44   | 0.4   | 100.7 | 0.28 | 93.6  | 93.6  |
| Hf | MS | 0.01  | 2.7    | 3.0   | 110.1 |      | <DL   | -     |
| Ta | MS | 0.01  | 0.4    | 0.3   | 99.9  | 1.4  | 83.4  | 83.4  |
| W  | MS | 0.02  | 0.4    | 0.3   | 63.2  | -    | <DL   | -     |
| Re | MS | 0.007 | -      | <DL   | -     | -    | <DL   | -     |
| Ir | MS | 0.005 | -      | <DL   | -     | -    | <DL   | -     |
| Pt | MS | 0.01  | -      | <DL   | -     | -    | <DL   | -     |
| Au | MS | 0.03  | 0.0026 | <DL   | -     | -    | <DL   | -     |
| Hg | MS | 0.01  | -      | 0.018 | -     | -    | <DL   | -     |
| Tl | MS | 0.005 | -      | 0.05  | -     | -    | <DL   | -     |
| Pb | MS | 0.07  | 3.0    | 2.6   | 85.9  | -    | <DL   | -     |
| Bi | MS | 0.01  | -      | <DL   | -     | -    | <DL   | -     |
| Th | MS | 0.006 | 1.0    | 1.1   | 106.8 | 1.2  | 103.5 | 103.5 |
| U  | MS | 0.005 | 0.5    | 0.5   | 107.2 | -    | <DL   | -     |

**Table S3.** Exposure parameters used for the health risk assessment.

| Element | RfD <sub>inh</sub> | RfD <sub>derm</sub> | RfD <sub>inh</sub> | SF <sub>ing</sub> | SF <sub>derm</sub> | SF <sub>inh</sub> | References     |
|---------|--------------------|---------------------|--------------------|-------------------|--------------------|-------------------|----------------|
| Mn      | 0.14               | 0.0084              | 0.000014           | -                 | -                  | -                 | US EPA (2020a) |
| Fe      | 0.7                | 0.07                | -                  | -                 | -                  | -                 | US EPA (2020b) |
| Pb      | 0.0036             | 0.00036             | -                  | 0.0085            | 0.085              | 0.042             | OEHHA (2020)   |
| Cr      | 1.5                | 0.0195              | 0.00143            | -                 | -                  | -                 | US EPA (2020a) |
| Co      | 0.0003             | 0.00003             | 0.0000017          | -                 | -                  | -                 | US EPA (2020b) |
| Ni      | 0.011              | 0.00044             | 0.0000257          | -                 | -                  | -                 | OEHHA (2020)   |
| Cu      | 0.01               | 0.0057              | -                  | -                 | -                  | -                 | ATSDR (2020)   |
| Zn      | 0.3                | 0.03                | -                  | -                 | -                  | -                 | US EPA (2020a) |
| As      | 0.0003             | 0.000285            | 0.000429           | 1.5               | 1.58               | 15.05             | US EPA (2020a) |
| Cd      | 0.001              | 0.000025            | 0.00000286         | -                 | -                  | -                 | US EPA (2020a) |
| Sb      | 0.0004             | 0.00006             | 0.0000857          | -                 | -                  | -                 | US EPA (2020a) |

Equations for the human health risk assessment

The average daily dose (ADD), which reflects chronic exposure to a contaminant received through each exposure pathway, was calculated using the following equations (US EPA 1989)

$$ADD_{ing} = \frac{Ci \times IRs \times FI \times EF \times ED \times CF}{BW \times AT} \quad (1)$$

$$ADD_{derm} = \frac{Ci \times SA \times AF \times ABSd \times EF \times ED \times CF}{BW \times AT} \quad (2)$$

$$ADD_{inh} = \frac{Ci \times IRa \times EF \times ED}{BW \times AT \times PEF} \quad (3)$$

Individual noncancerogenic risk was calculated as

$$HQ = \frac{ADD}{RfD} \quad (4)$$

To access the overall potential for noncancerogenic risk posed by all PTE for all proposed pathways, a total hazard index was calculated (UA EPA 1989). The cumulative noncancerogenic risk of k number of contaminants was calculated as

$$HI = \sum_{k=1}^n \left( \frac{ADD_{ing}}{RfD_{ing}} + \frac{ADD_{derm}}{RfD_{derm}} + \frac{ADD_{inh}}{RfD_{inh}} \right) \quad (5)$$

## References

- ATSDR (Agency for Toxic Substances and Disease Registry).(2020). Minimal risk levels (MRLs) list. March 2020.<https://www.atsdr.cdc.gov/mrls/pdfs/ATSDR%20MRLs%20-%20March%202020%20-%20H.pdf>. Retrieved March20, 2020.
- OEHHA (California Office of Environmental Health Hazard Assessment). (2020) Chemical database. <https://oehha.ca.gov/chemicals>. Retrieved March 21, 2020

US EPA (US Environmental Protection Agency). (2020a). Integrated Risk Information System (IRIS). Washington, DC:Office of Research and Development. [https://cfpub.epa.gov/ncea/iris\\_drafts/AtoZ.cfm](https://cfpub.epa.gov/ncea/iris_drafts/AtoZ.cfm). Retrieved March 20, 2020.

US EPA (US Environmental Protection Agency). (2020b). Provisional peer-reviewed toxicity values (PPRTVs).Washington, DC: Office of Research and Development. <https://www.epa.gov/pprtv/provisional-peer-reviewedtoxicity-values-pprtvs-assessments>. Retrieved March 20,2020.
